# Supplementary material for: Calcium- and polyphosphate-containing acidic granules of sea urchin eggs are similar to acidocalcisomes, but are not the targets for NAADP
Source: PubMed Central journal article supplement — Biochem J. 2010 Jul 14;429(Pt 3):485–95. doi: 10.1042/BJ20091956 (PMC2907711; doi:10.1042/bj20091956), 2010-07-14
Supplement: bj4290485add.pdf [file bj4290485add.pdf]

SUPPLEMENTARY ONLINE DATA

Calcium- and polyphosphate-containing acidic granules of sea urchin eggs are similar to acidocalcisomes, but are not the targets for NAADP

Isabela B. RAMOS\*†, Kildare MIRANDA†‡, Douglas A. PACE\*, Katherine C. VERBIST\*, Fu-Yang LIN§, Yonghui ZHANG||, Eric OLDFIELD§||, Ednildo A. MACHADO†‡, Wanderley DE SOUZA† and Roberto DOCAMPO\*<sup>1</sup>

\*Department of Cellular Biology and Center for Tropical and Emerging Global Diseases, University of Georgia, Athens, GA 30602, U.S.A., †Instituto de Biofísica Carlos Chagas Filho, and Instituto Nacional de Ciência e Tecnologia em Bioimagem e Biologia Estrutural, Universidade Federal do Rio de Janeiro, Rio de Janeiro, RJ 21941, Brazil, ‡Instituto Nacional de Metrologia Normalização e Qualidade Industrial, Diretoria de Programas, Xerém, Rio de Janeiro, RJ 25250, Brazil, §Center for Biophysics and Computational Biology, University of Illinois at Urbana-Champaign, Urbana, IL 61801, U.S.A., and ||Department of Chemistry, University of Illinois at Urbana-Champaign, Urbana, IL 61801, U.S.A.

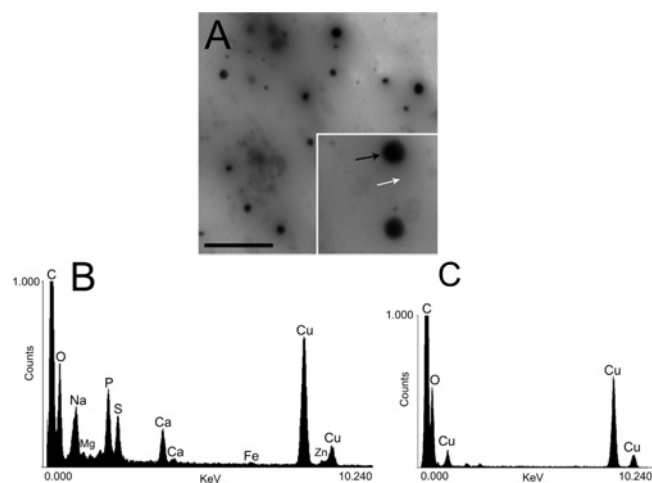

Figure S1 Electron microscopy and X-ray microanalysis of the dense granule fraction

(A) Direct observation of unfixed and unstained dense granules air-dried directly on to microscope grids. (B) Typical X-ray microanalysis spectrum of dense granules (black arrow). (C) Control spectrum of an adjacent area (white arrow). Scale bars in (A) are 0.5  $\mu$ m.

<sup>1</sup> To whom correspondence should be addressed (email rdocampo@uga.edu).

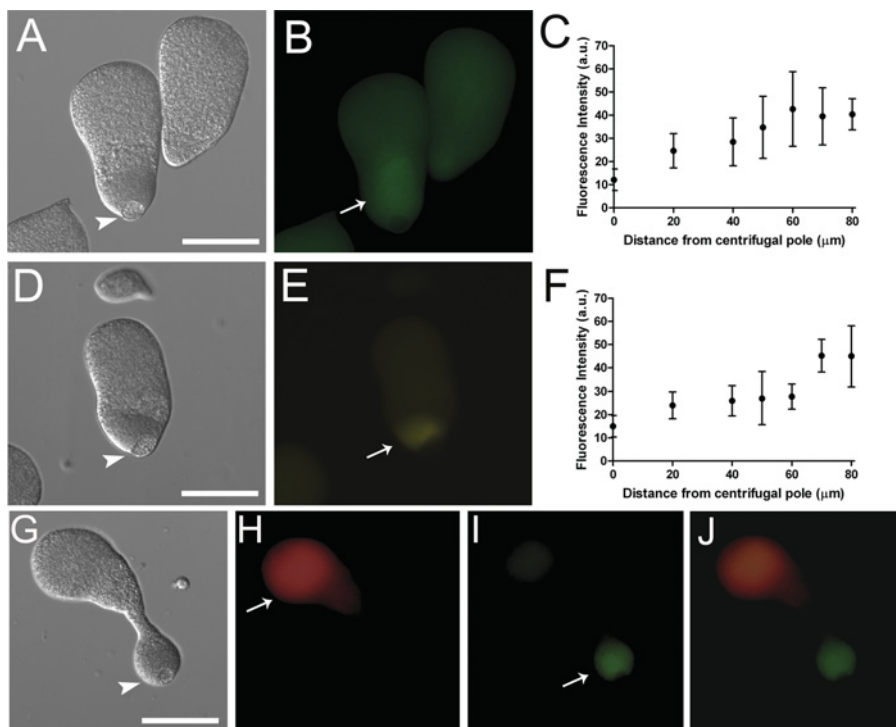

**Figure S2 Segregation of poly P stores in stratified sea urchin eggs**

(A, B and C) Sea urchin eggs were stratified and poly P stores were localized using the recombinant PPBD of *E. coli* PPX linked with an Xpress epitope tag. (D, E and F) Stratified eggs after DAPI incubation for poly P localization. (C and F) Fluorescence intensity profile plots of PPBD and DAPI staining respectively. Graphs show means  $\pm$  S.D. for five eggs. (G, H, I and J) Sea urchin eggs were incubated with LysoTracker Red, stratified and then fixed and stained with PPBD as described in the Materials and methods section of the main text. (G) Differential interferential contrast microscopy image of one stratified egg. (H, I and J) LysoTracker, PPBD and merged corresponding images of (G) respectively. Arrows in (B, E, H and I) indicate staining near the centripetal pole, where the nucleus and lipid droplets (arrowheads in A, D and G) are also located. Images were not deconvolved. Scale bars are 50  $\mu$ m.

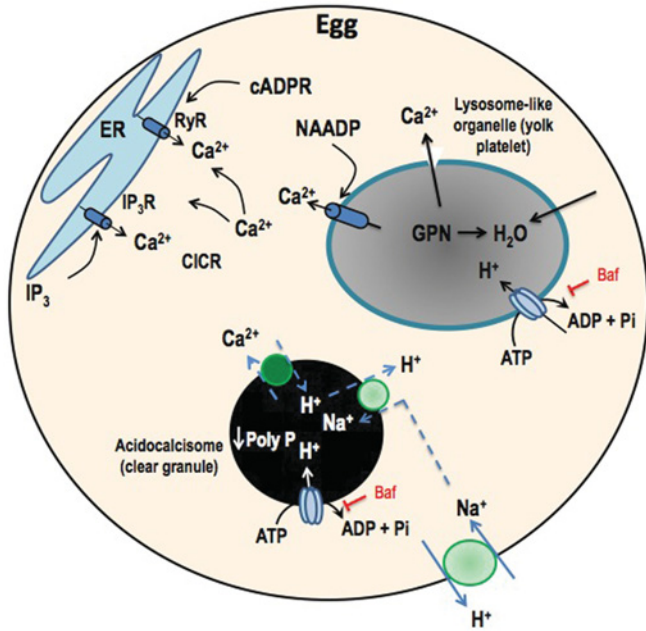

**Figure S3 Proposed  $\text{Ca}^{2+}$  mobilization pathways in sea urchin eggs**

ER, acidocalcisomes and yolk platelets are major  $\text{Ca}^{2+}$  storage organelles.  $\text{IP}_3$  receptors ( $\text{IP}_3\text{R}$ ) and ryanodine receptors ( $\text{RyR}$ ) mediate  $\text{Ca}^{2+}$  release from the ER in response to increases in  $\text{IP}_3$  and cADPR respectively. Both receptors types are, in addition, activated by  $\text{Ca}^{2+}$  via the so-called  $\text{Ca}^{2+}$ -induced  $\text{Ca}^{2+}$ -release mechanism (CICR). NAADP triggers  $\text{Ca}^{2+}$  release from yolk platelets and this in turn triggers ER  $\text{Ca}^{2+}$  mobilization through  $\text{Ca}^{2+}$ -induced  $\text{Ca}^{2+}$  release via  $\text{IP}_3\text{R}$  and  $\text{RyR}$ .  $\text{Na}^+$  entry after fertilization leads to alkalinization of the cytosol and stimulates  $\text{Ca}^{2+}$  release from acidocalcisomes by coupling the activity of  $\text{Na}^+/\text{H}^+$  and  $\text{Ca}^{2+}/\text{H}^+$  exchangers. GPN is hydrolysed by cathepsin C increasing the osmolarity of yolk platelets, attracting water and leading to osmotic lysis and  $\text{Ca}^{2+}$  release. Both acidocalcisomes and yolk platelets possess bafilomycin  $\text{A}_1$  (Baf)-sensitive vacuolar-type  $\text{H}^+$ -ATPases to acidify the organelles. Poly P is hydrolysed after alkalinization of acidocalcisomes.

Received 23 December 2009/6 May 2010; accepted 24 May 2010  
Published as BJ Immediate Publication 24 May 2010, doi:10.1042/BJ20091956
